# Supplementary material for: Fluorimetric and colorimetric analysis of total iron ions in blood or tap water using nitrogen-doped carbon dots with tunable fluorescence
Source: Royal Society of Chemistry journal article supplement (doi:10.1039/c8nj00711j), 2018-01-01
Supplement: c8nj00711j1.pdf [file c8nj00711j1.pdf]

## Electronic Supplementary Information

### **Fluorimetric and colorimetric analysis for total iron ions in blood or tap water using nitrogen-doped carbon dots with tunable fluorescence**

Fengjuan Liu, Yao Jiang, Chuan Fan, Liyan Zhang, Yue Hua, Chunxian Zhang, Ning Song, Yingjie Kong, Hua Wang \*

Institute of Medicine and Materials Applied Technologies, College of Chemistry and Chemical Engineering, Qufu Normal University, Qufu City, Shandong Province 273165, P. R. China.

\* Corresponding authors: [huawangqfnu@126.com](mailto:huawangqfnu@126.com)

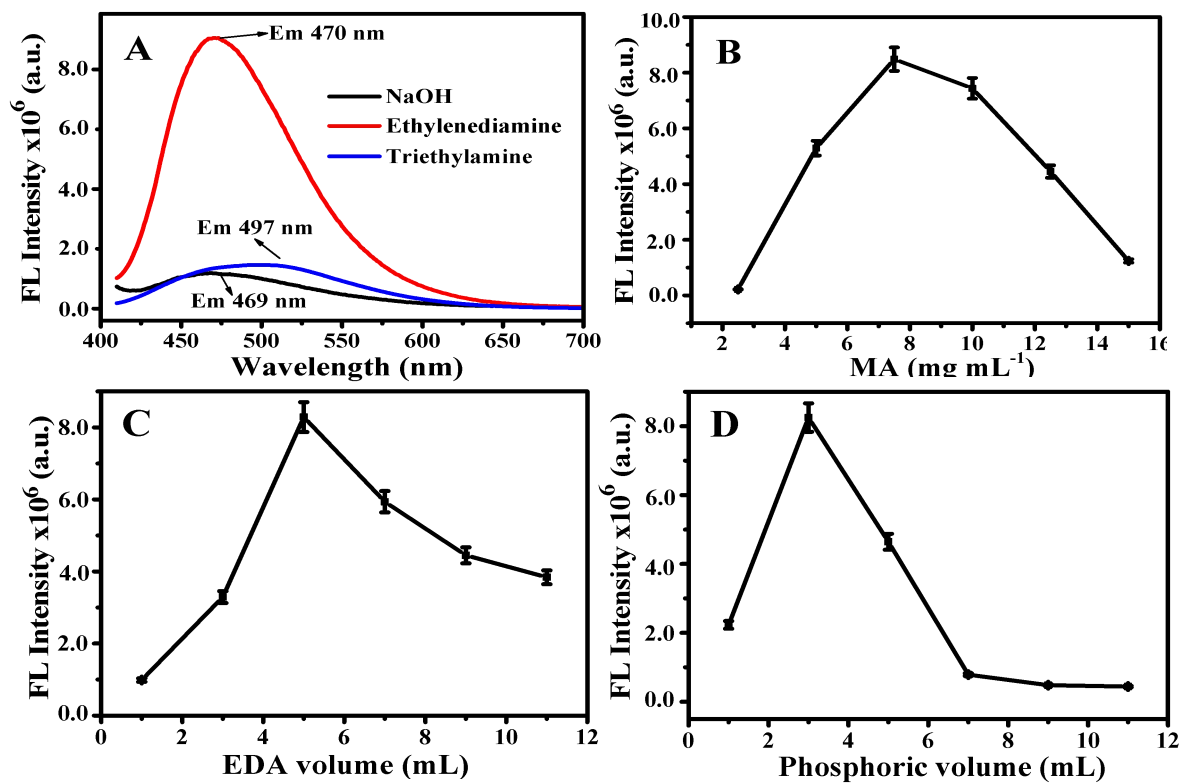

**Fig. S1** (A) FL spectra ( $\lambda_{\text{exc}} = 396 \text{ nm}$ ) of MA-derivatized N-Cdots ( $0.24 \text{ mg mL}^{-1}$ ) prepared using different alkaline precursors of EDA, NaOH (1.0 M), and triethylamine separately mixed with  $\text{H}_3\text{PO}_4$  at the volume ratio of 5 / 3. Fluorescence intensities of N-Cdots prepared depending on the dosages of (B) MA, (C) EDA, and (D) phosphoric acid using  $7.5 \text{ mg mL}^{-1}$  MA.

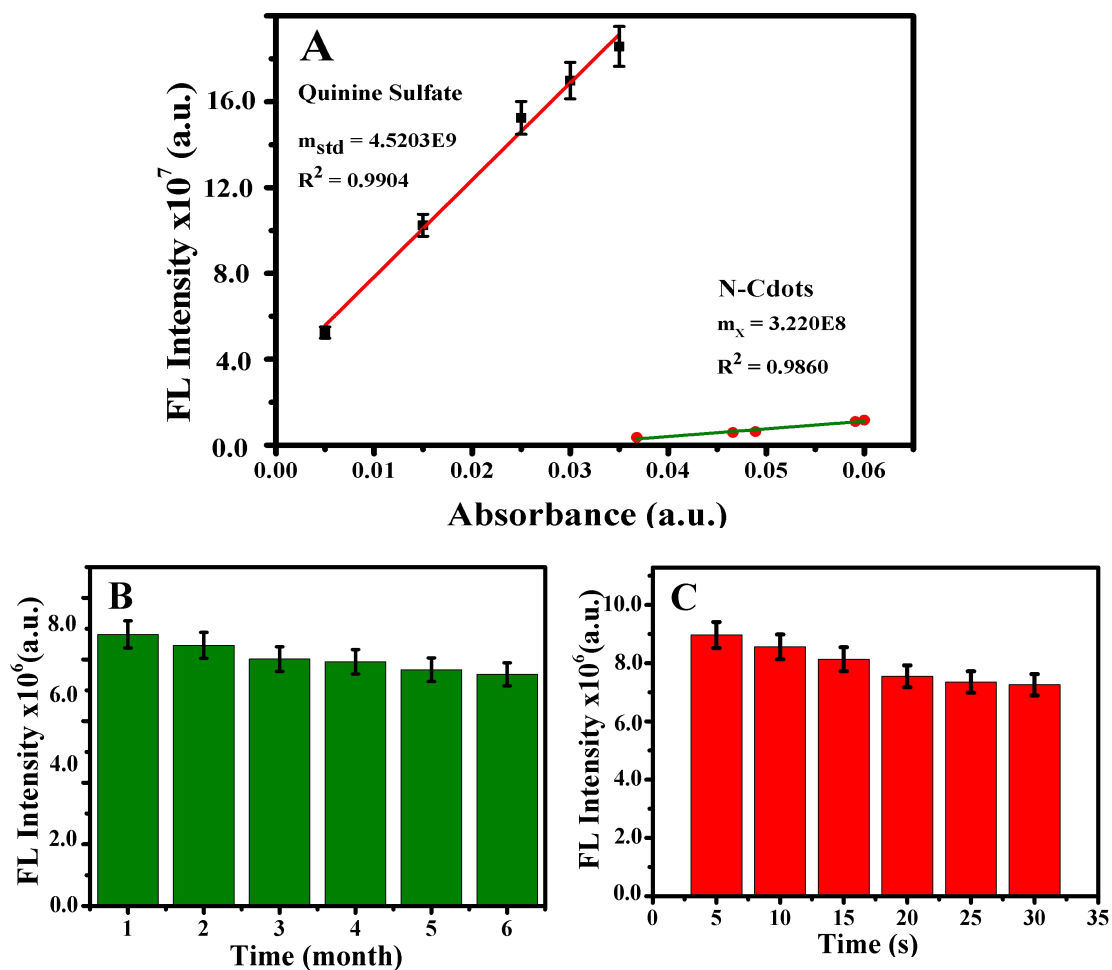

**Fig. S2** (A) The plotting for the fluorescence intensities versus absorbance values of N-Cdots or quinine sulfate. (B) Environmental stability of N-Cdots ( $0.24 \text{ mg mL}^{-1}$ ) stored in water over different time intervals. (C) Photostability of N-Cdots ( $0.24 \text{ mg mL}^{-1}$ ) exposed under xenon lamp, of which the fluorescence intensities were recorded with exposure time indicated.

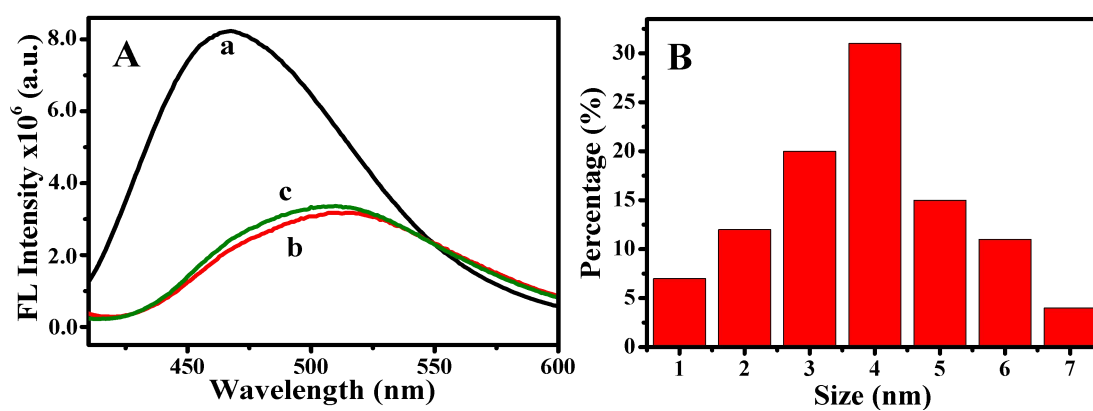

**Fig. S3** (A) Comparison of fluorimetric spectra ( $\lambda_{\text{ex}} = 396 \text{ nm}$ ) of N-Cdots ( $0.24 \text{ mg mL}^{-1}$ ) in the (a) absence and presence of (b)  $\text{Fe}^{3+}$  ions ( $1.0 \mu\text{M}$ ) or (c)  $\text{Fe}^{3+}$  ions ( $1.0 \mu\text{M}$ ) with Fe powder. (B) The size distribution of N-Cdots by dynamic light scattering analysis.

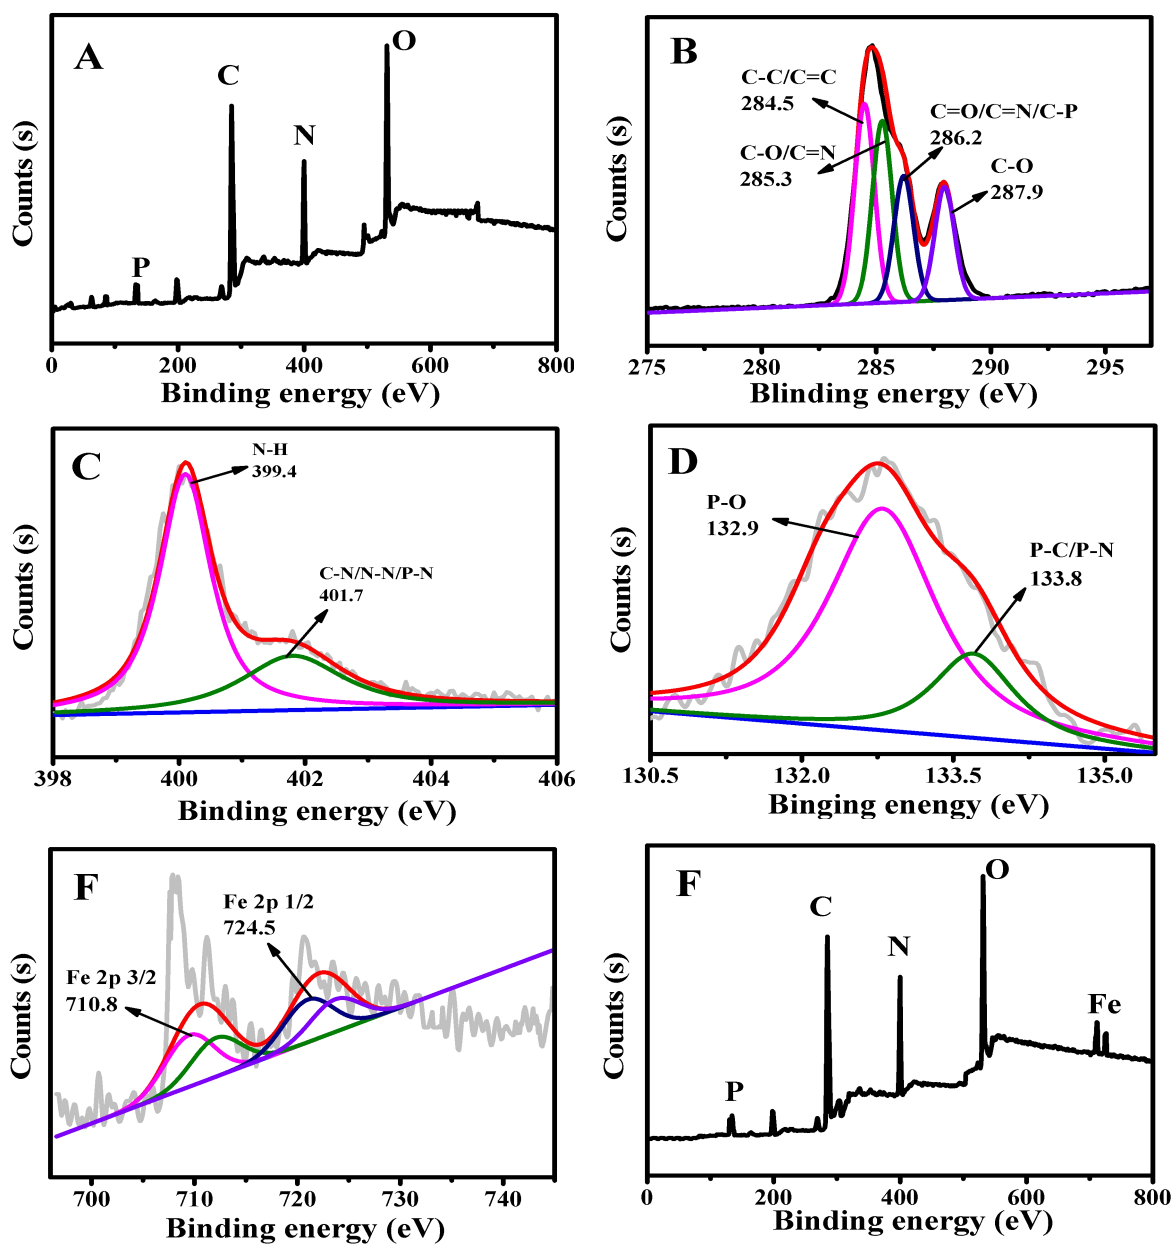

**Fig. S4** X-ray photoelectron spectroscopy (XPS) spectra of the as-prepared N-Cdots without iron ions of (A) total elements, (B) C, (C) N, and (D) P; XPS spectra of the ones with iron ions of (E) iron element and (F) total elements.

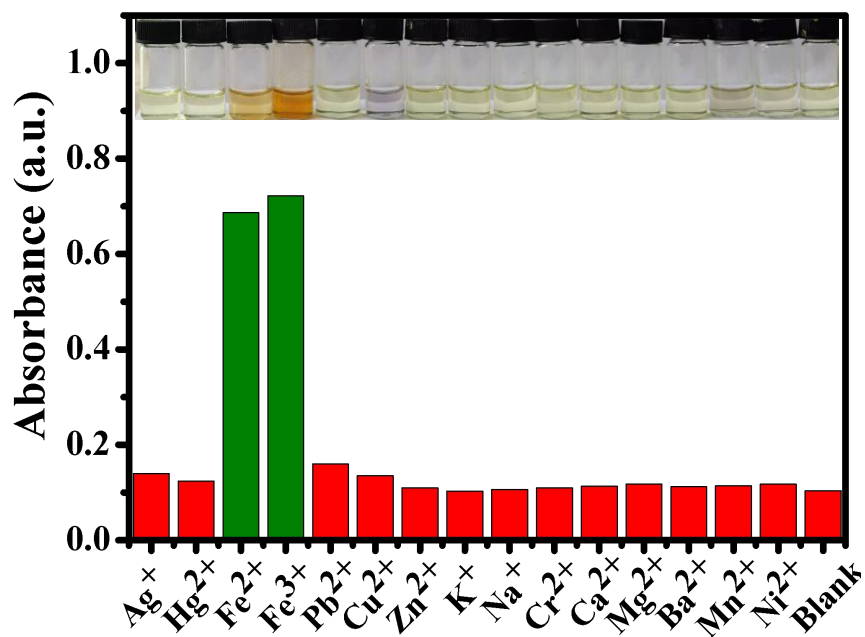

**Fig. S5** Colorimetric responses of N-Cdots ( $0.24 \text{ mg mL}^{-1}$ ) to  $\text{Fe}^{2+}$  or  $\text{Fe}^{3+}$  ions ( $1.0 \text{ }\mu\text{M}$ ) and other metal ions ( $1.0 \text{ }\mu\text{M}$ ) indicated, with the corresponding photographs of the metal ion solutions (top) and the product solutions (bottom) under visible light.

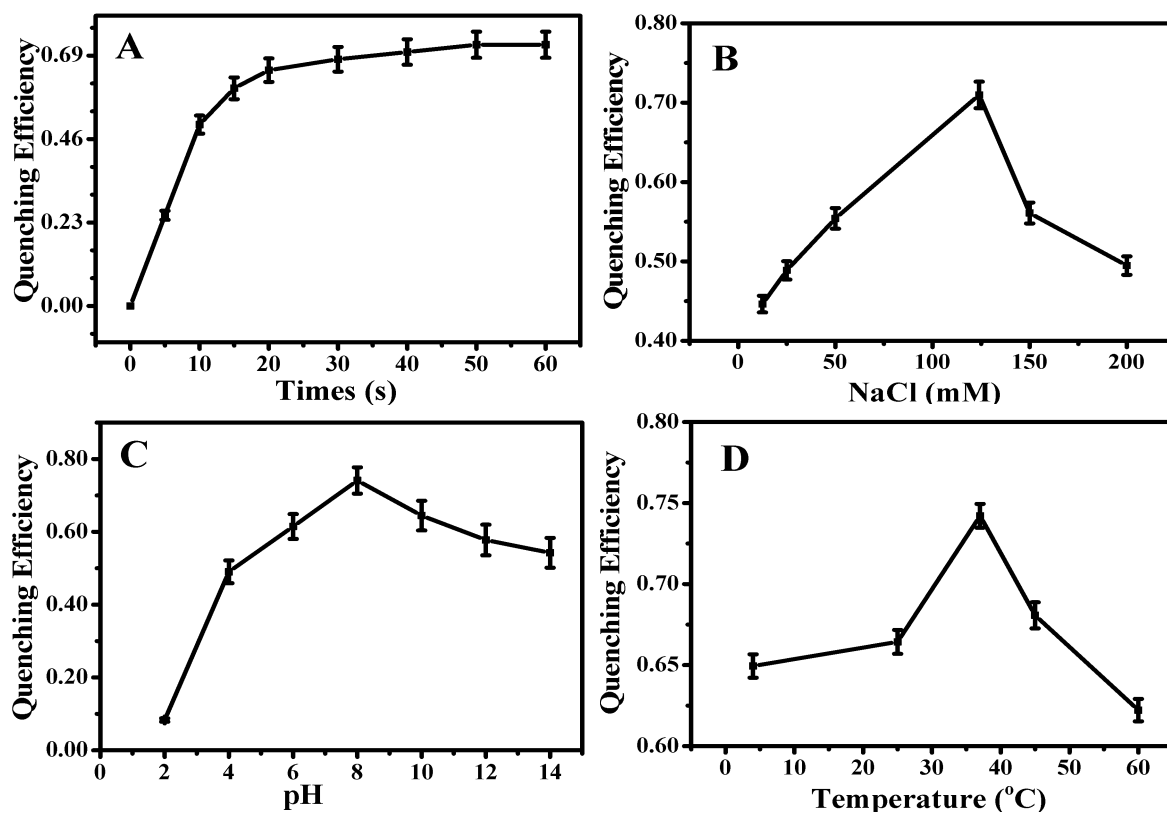

**Fig. S6** Quenching efficiencies of N-Cdots in the presence of  $\text{Fe}^{3+}$  ions (1.0  $\mu\text{M}$ ) depending on (A) reaction time, (B) ion strengths in NaCl concentrations, (C) pH values (from 2.0 to 12), and (D) reaction temperature.

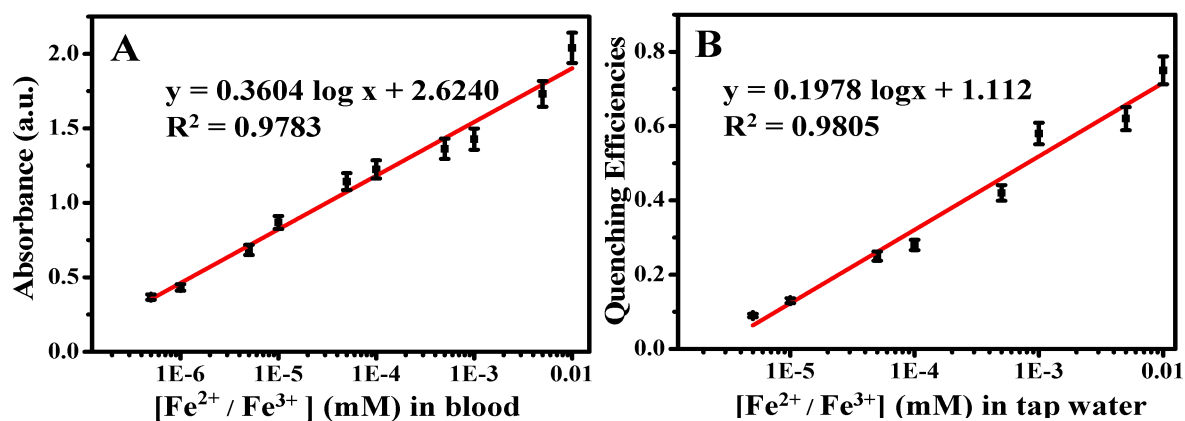

**Fig. S7** The calibration detection curves of the N-Cdots-based (A) colorimetric and (B) fluorimetric analysis describing the relationship between absorbance values (A), or quenching efficiencies (B) the versus the concentrations of total  $Fe^{3+}/Fe^{2+}$  ions of different concentrations spiked in blood and tap water samples, respectively.



**Table S1** Comparison of LODs among various fluorimetric analysis methods using different probes for detecting Fe<sup>3+</sup> ions.

| <b>Fluorescent Probes</b>          | <b>LODs</b>          | <b>References</b> |
|------------------------------------|----------------------|-------------------|
| Aminoantipyrine                    | 0.211 $\mu\text{M}$  | Ref. 1            |
| Pyrazoline derivative              | 1.4 $\mu\text{M}$    | Ref. 2            |
| Graphene quantum dots              | 0.020 $\mu\text{M}$  | Ref. 3            |
| Sulfur-doped graphene quantum dots | 0.0042 $\mu\text{M}$ | Ref. 4            |
| N and S doped carbon dots          | 0.80 $\mu\text{M}$   | Ref. 5            |
| N-Cdots                            | 0.0050 $\mu\text{M}$ | This work         |

1. Y. Zhou, H. Zhou, J. Zhang, L. Zhang, J. Niu, *Spectrochimica Acta Part A Molecular & Biomolecular Spectroscopy*, 2012, 98, 14-17.
2. S. Hu, S. Zhang, C. Gao, C. Xu, Q. Gao, *Spectrochimica Acta Part A Molecular & Biomolecular Spectroscopy*, 2013, 113, 325-331.
3. R. Guo, S. Zhou, Y. Li, X. Li, L. Fan, N.H. Voelcker, *ACS Applied Materials & Interfaces*, 2015, 7, 23958-23966.
4. S. Li, Y. Li, J. Cao, J. Zhu, L. Fan, X. Li, *Analytical Chemistry*, 2014, 86, 10201-10207.
5. W. Lu, X. Gong, M. Nan, Y. Liu, S. Shuang, C. Dong, *Analytica Chimica Acta*, 2015, 898, 116-127.
